# Supplementary material for: A fluorous-tag-assisted fluorescent probe for simple and selective detection of hydrogen sulfide: application for turbid dyeing solutions
Source: Royal Society of Chemistry journal article supplement (doi:10.1039/d3ra06740h), 2023-01-01
Supplement: d3ra06740h1.pdf [file d3ra06740h1.pdf]

## Electronic Supplementary Information (ESI)

### A fluorous-tag-assisted fluorescent probe for simple and selective detection of hydrogen sulfide: Application for turbid dyeing solutions

Geonwoo Park<sup>†</sup>, Mincheol Jang<sup>†</sup>, and Min Su Han\*

Department of Chemistry, Gwangju Institute of Science and Technology, 123  
Cheomdangwagi-ro, Buk-gu, Gwangju 61005, Republic of Korea

E-mail: happyhan@gist.ac.kr; Fax: +82-62-715-2866; Tel: +82-62-715-2848

<sup>†</sup> Geonwoo Park and Mincheol Jang contributed equally.

|                                       |            |
|---------------------------------------|------------|
| <b>1. Synthetic procedures .....</b>  | <b>S2</b>  |
| <b>2. Supplementary figures .....</b> | <b>S4</b>  |
| <b>3. References .....</b>            | <b>S15</b> |

## 1. Synthetic procedures

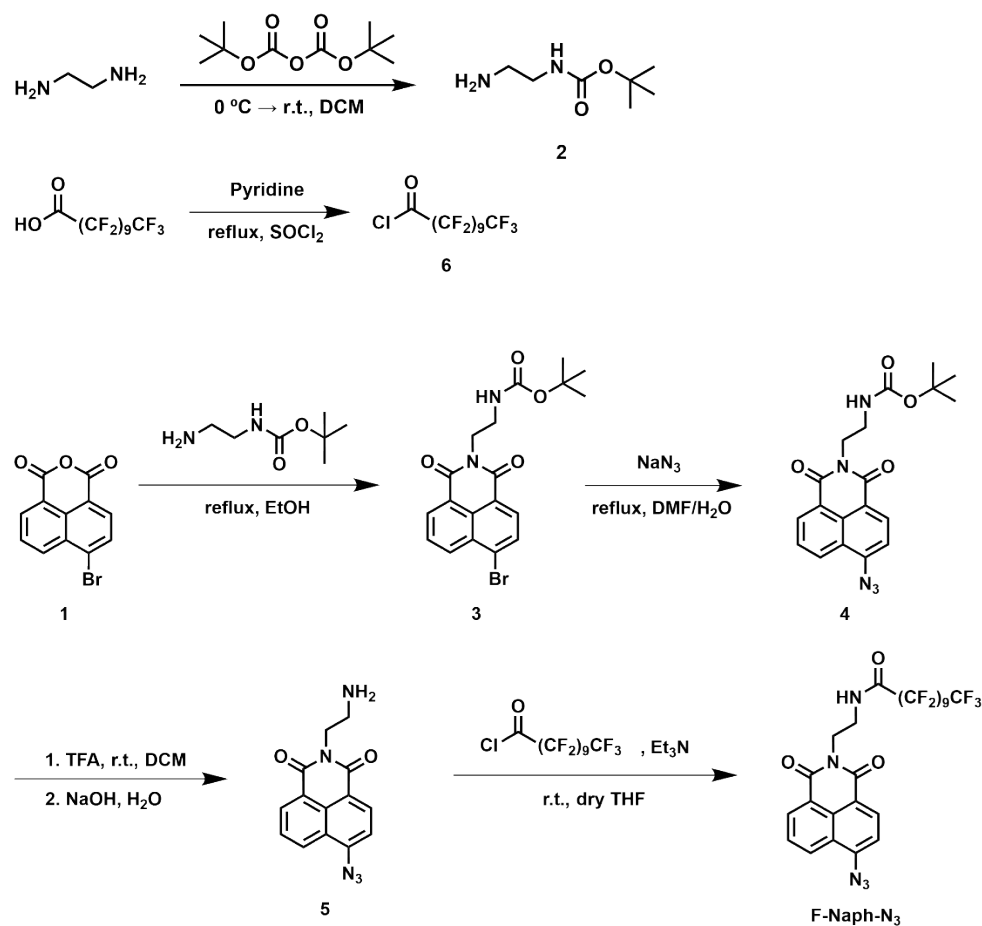

**Scheme S1.** Reaction scheme illustrating the synthetic procedure for F-Naph-N<sub>3</sub>.

### *Synthesis of 2 [S1]*

Ethylenediamine (200 mmol, 13.3 mL) was dissolved in 100 mL of dichloromethane (DCM) and vigorously stirred at 0 °C for 15 min. *di-tert-butyl* bicarbonate was dissolved in 80 mL of DCM and added slowly to stirred solution of ethylenediamine for 3 h. After dropwise, the solution was further stirred for 24 h at room temperature. The solvent was then removed under reduced pressure. The crude product was diluted with H<sub>2</sub>O and extracted with DCM. The organic layer was washed with brine, dried over sodium sulfate anhydrous (Na<sub>2</sub>SO<sub>4</sub>), and concentrated under reduced pressure to afford **2** (1.99 g, 59%) as a colorless oil. <sup>1</sup>H NMR (400 MHz, CDCl<sub>3</sub>, δ, ppm): 4.99 (br s, 1H), 3.14–3.18 (q, *J* = 5.6 Hz, 2H), 2.78–2.81 (t, *J* = 6.4 Hz, 2H), 1.42 (br s, 9H). <sup>13</sup>C NMR (100 MHz, CDCl<sub>3</sub>, δ, ppm): 156.37, 79.35, 43.30, 41.89, 28.52.

### Synthesis of 3 [S2]

**2** (2.12 g, 13.2 mmol) was dissolved in 25 mL of ethanol (EtOH) and stirred for a few minutes. **1** (3.6 g, 13.0 mmol) was added, and then the reaction mixture was refluxed for 3 h. The reaction mixture was cooled to room temperature. The precipitated solid was filtered, washed with EtOH, and dried under vacuum to afford **3** (4.51 g, 83%) as a white solid. <sup>1</sup>H NMR (400 MHz, CDCl<sub>3</sub>, δ, ppm): 8.58–8.60 (dd, *J* = 7.2, 1.2 Hz, 1H), 8.47–8.50 (d, *J* = 8.8 Hz, 1H), 8.34–8.36 (d, *J* = 7.6 Hz, 1H), 7.97–7.98 (d, *J* = 8.0, 1H), 7.77–7.81 (dd, *J* = 8.0, 7.2 Hz, 1H), 5.01 (br s, 1H), 4.30–4.33 (t, *J* = 11.6, 2H), 3.51–3.52 (m, 2H), 1.27 (br s, 9H). <sup>13</sup>C NMR (100 MHz, CDCl<sub>3</sub>, δ, ppm): 163.95, 163.93, 156.12, 133.36, 132.22, 131.39, 131.13, 130.57, 130.42, 129.01, 128.11, 122.90, 122.03, 79.22, 40.11, 39.56, 28.29. Melting point: 177–178 °C. HRMS (EI+): *m/z* calculated for C<sub>19</sub>H<sub>19</sub>BrN<sub>2</sub>O<sub>4</sub>+H<sup>+</sup> [M+H<sup>+</sup>]: 420.0510, found: 420.0515.

### Synthesis of 4

**3** (1.26 g, 3.0 mmol) was dissolved in 15 mL of dimethylformaldehyde (DMF) and the suspended solution was heated. Sodium azide (0.78 g, 12.0 mmol) was dissolved in 2 mL of water and added slowly to the reaction mixture. The reaction mixture was refluxed for 2 h, dissolved in excess of water and filtered. The residue was dissolved in DCM and washed with brine, dried over Na<sub>2</sub>SO<sub>4</sub>, and the solvent was evaporated under reduced pressure to give **4** (0.90 g, 79%) as an orange solid. <sup>1</sup>H NMR (400 MHz, CDCl<sub>3</sub>, δ, ppm): 8.62–8.64 (d, *J* = 7.2 Hz, 1H), 8.57–8.59 (d, *J* = 8.0 Hz, 1H), 8.42–8.44 (d, *J* = 8.4 Hz, 1H), 7.72–7.76 (t, *J* = 8.0 Hz, 1H), 7.45–7.47 (d, *J* = 8.0, 1H), 4.95 (br s, 1H), 4.33–4.36 (t, *J* = 6 Hz, 2H), 3.53 (m, 2H), 1.29 (br s, 9H). <sup>13</sup>C NMR (100 MHz, CDCl<sub>3</sub>, δ, ppm): 164.36, 163.90, 156.12, 143.60, 132.43, 131.92, 129.23, 128.92, 126.90, 124.31, 122.44, 118.71, 114.71, 79.21, 39.94, 39.69, 28.29. Melting point: 131–147 °C. HRMS (EI+): *m/z* calculated for C<sub>19</sub>H<sub>19</sub>N<sub>5</sub>O<sub>4</sub><sup>+</sup> [M<sup>+</sup>]: 381.1437, found: 381.1440.

### Synthesis of 5

**4** (0.85 g, 2.2 mmol) and trifluoroacetic acid (TFA, 1.7 mL, 22.2 mmol) were dissolved in 10 mL of DCM and stirred for 1.5 h at room temperature. The solvent and TFA were removed under reduced pressure and poured into water. A sodium hydroxide solution (1 M) was added into the solution to deprotonate the ammonium salt. The precipitated solid was filtered, and the residue was dissolved in DCM, washed with brine, dried over Na<sub>2</sub>SO<sub>4</sub>, and the solvent was evaporated under reduced pressure to afford **5** as a brown solid. <sup>1</sup>H NMR (400 MHz, DMSO-*d*<sub>6</sub>, δ, ppm): 8.48–8.50 (d, *J* = 7.2 Hz, 1H), 8.42–8.44 (d, *J* = 8.0 Hz, 1H), 8.37–8.39 (dd, *J* = 8.4, 1.2 Hz, 1H), 7.82–7.86 (t, *J* = 8.0 Hz, 1H), 7.70–7.73 (d, *J* = 8.4 Hz, 1H), 4.02–4.05 (t, *J* = 6.4 Hz, 2H), 2.77–2.81 (t, *J* = 7.6 Hz, 2H), 1.60 (br s). <sup>13</sup>C NMR (100 MHz, DMSO-*d*<sub>6</sub>, δ, ppm): 163.39, 162.95, 142.62, 131.44, 131.35, 128.29, 128.16, 127.21, 123.43, 122.25, 118.28, 115.84, 42.71 (one peak in aminoethyl was not observed due to the solvent peak). Melting point: 116–125 °C. HRMS (EI+): *m/z* calculated for C<sub>14</sub>H<sub>11</sub>N<sub>5</sub>O<sub>2</sub><sup>+</sup> [M+H<sup>+</sup>]: 282.0985, found: 282.0984.

## 2. Supplementary figures

### UV/Vis spectra

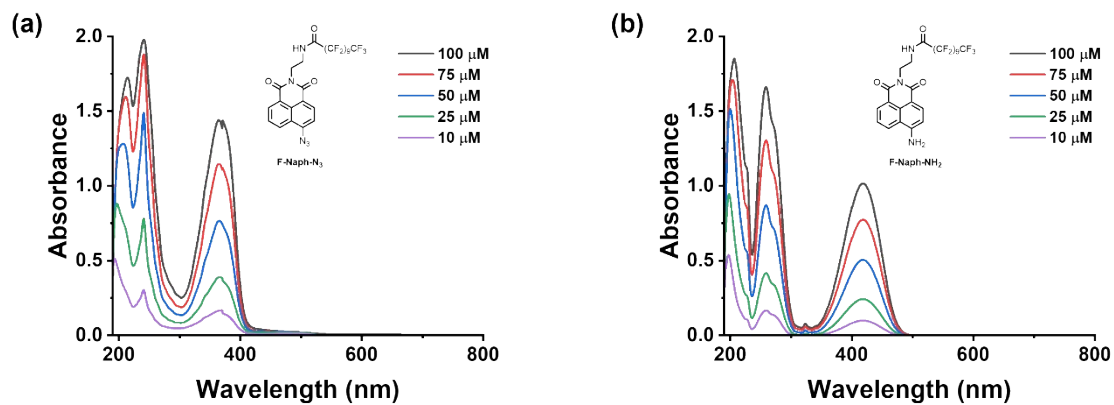

Figure S1. UV/Vis spectra for (a) F-Naph-N<sub>3</sub> and (b) F-Naph-NH<sub>2</sub> in acetonitrile (ACN).

### Titration for H<sub>2</sub>S in solution

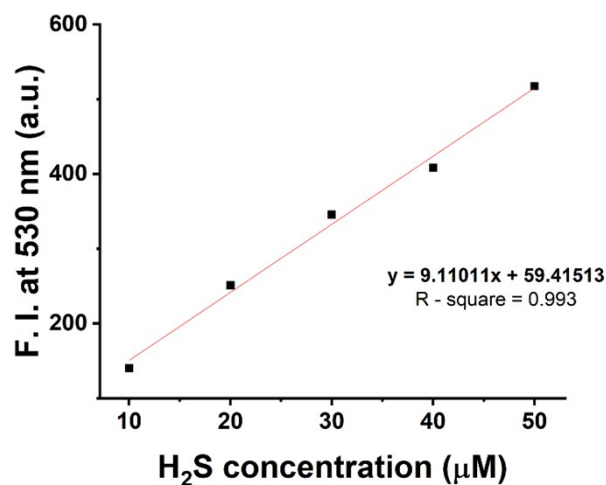

Figure S2. Plot of fluorescence intensity at 530 nm of solution containing F-Naph-N<sub>3</sub> (20 μM) with various concentrations of H<sub>2</sub>S in an ACN/H<sub>2</sub>O solution (v/v = 6:4, pH 8.0 sodium phosphate buffer 10 mM) after 1 h. [PMT: 580 V, Slit: 5 nm]

### The quenching effect of copper nitrate as a H<sub>2</sub>S scavenger

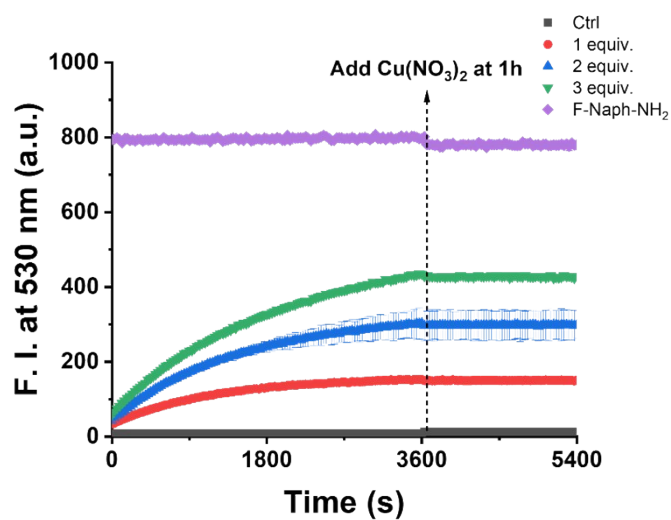

**Figure S3.** Time-dependent fluorescence intensity of F-Naph-N<sub>3</sub> (20 μM) at 530 nm with the different concentrations of H<sub>2</sub>S (1, 2, and 3 equiv.) in an ACN/H<sub>2</sub>O solution (v/v = 6:4, pH 8.0 sodium phosphate buffer 10 mM), and subsequent measurement after the addition of copper(II) nitrate trihydrate (2 equiv. of added H<sub>2</sub>S) at 1 h. [PMT: 580 V, Slit: 5 nm]

### F-Naph-N<sub>3</sub> treated by H<sub>2</sub>S on PTFE membrane

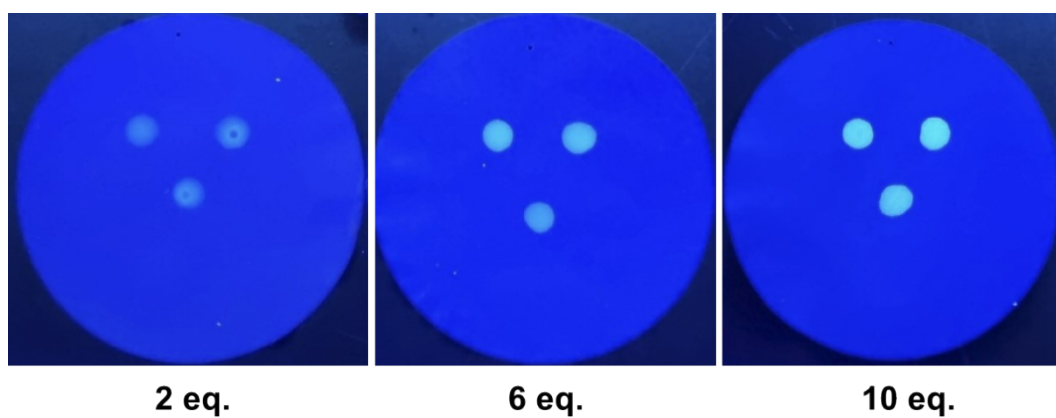

**Figure S4.** The fluorescence of F-Naph-N<sub>3</sub> treated by H<sub>2</sub>S on polytetrafluoroethylene (PTFE) membrane filter under the hand-held UV lamp (365 nm).

### Titration for H<sub>2</sub>S in fluorosolid-phase extraction (F-SPE) application

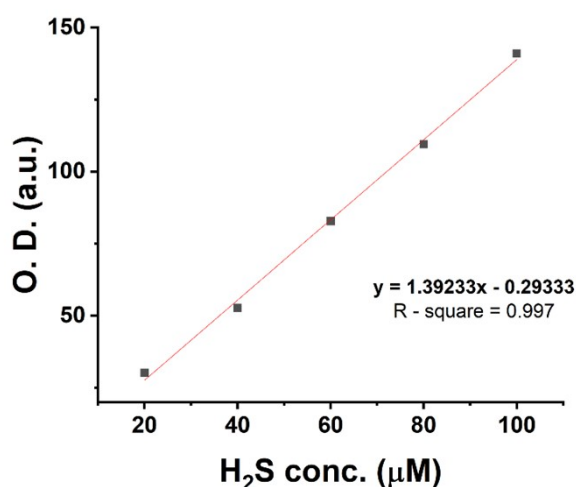

**Figure S5.** Plot of fluorescence intensity (optical density) of F-Naph-N<sub>3</sub> (20 μM) treated by various concentrations of H<sub>2</sub>S in F-SPE process. The solution was incubated for 1 h in an ACN/H<sub>2</sub>O solution ( $v/v = 6:4$ , pH 8.0 sodium phosphate buffer 10 mM) before spotting onto polytetrafluoroethylene (PTFE) membrane filter.

### Fluorescence measurements in dyeing solutions

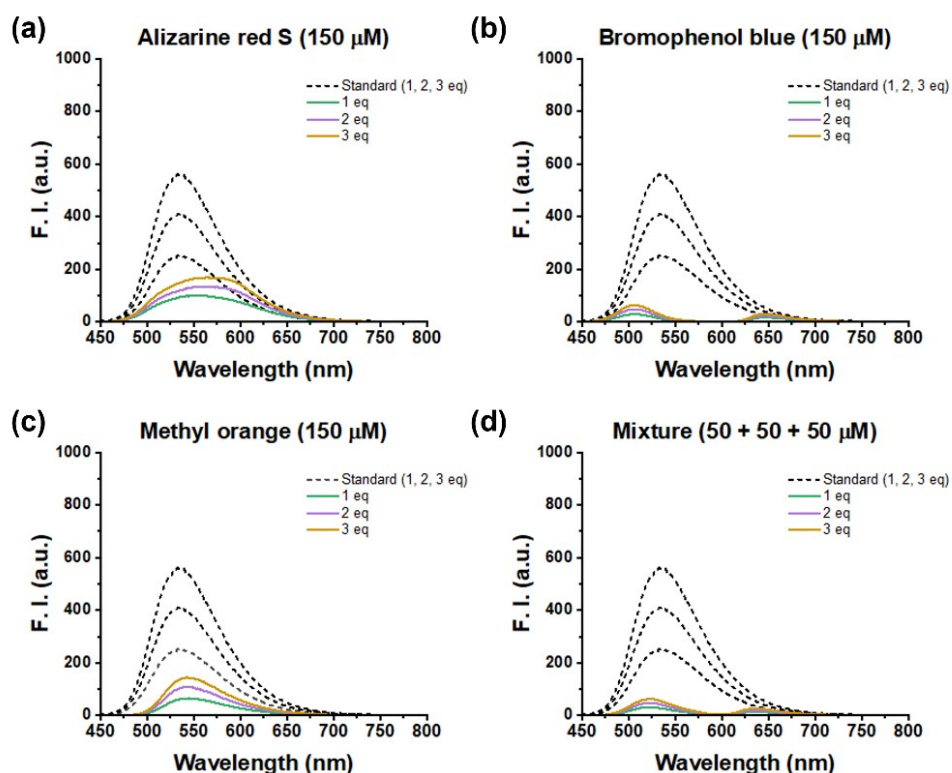

**Figure S6.** Fluorescence emission spectra of F-Naph-N<sub>3</sub> (20 μM) with the different concentrations of H<sub>2</sub>S (20, 40, and 60 μM) in an ACN/H<sub>2</sub>O solution ( $v/v = 6:4$ , pH 8.0 sodium phosphate buffer 10 mM) containing 150 μM of (a) alizarine red S, (b) bromophenol blue, (c) methyl orange, and (d) their mixture (50 μM of each dyes) after the incubation for 1 h. Dashed spectra represent the emission spectra in standard curve (Fig. 1d). [PMT: 580 V, Slit: 5 nm]

## NMR spectra

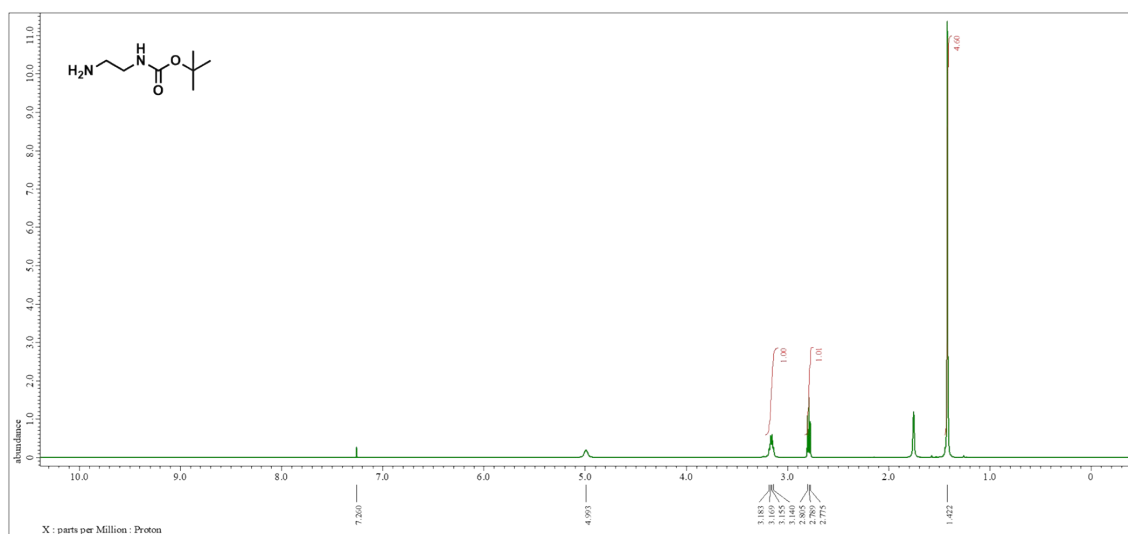

Figure S7. <sup>1</sup>H NMR spectrum (400 MHz, CDCl<sub>3</sub>) of 2.

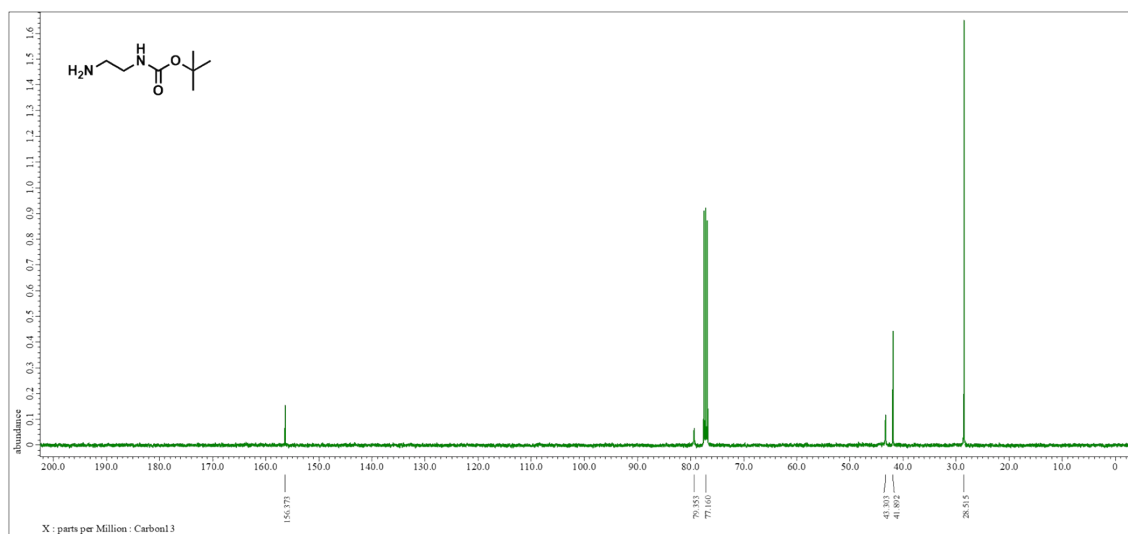

Figure S8. <sup>13</sup>C NMR spectrum (100 MHz, CDCl<sub>3</sub>) of 2.

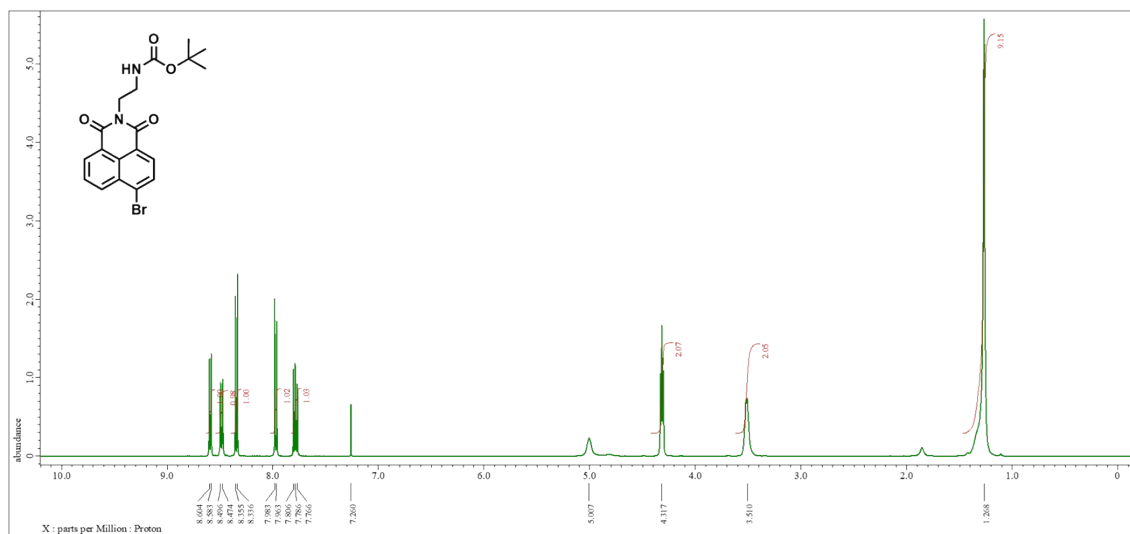

Figure S9. <sup>1</sup>H NMR spectrum (400 MHz, CDCl<sub>3</sub>) of 3.

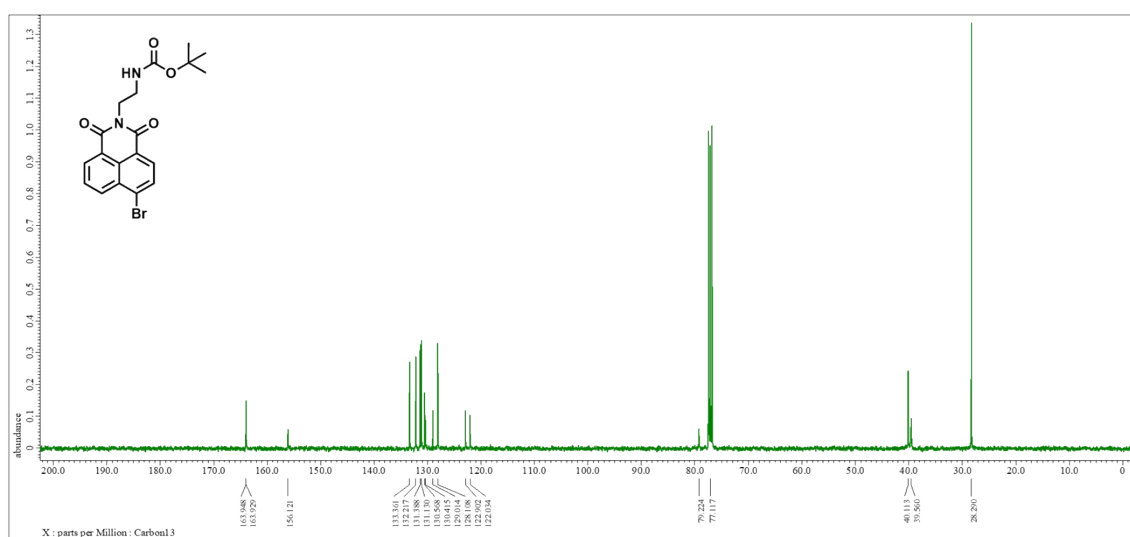

Figure S10. <sup>13</sup>C NMR spectrum (100 MHz, CDCl<sub>3</sub>) of 3.



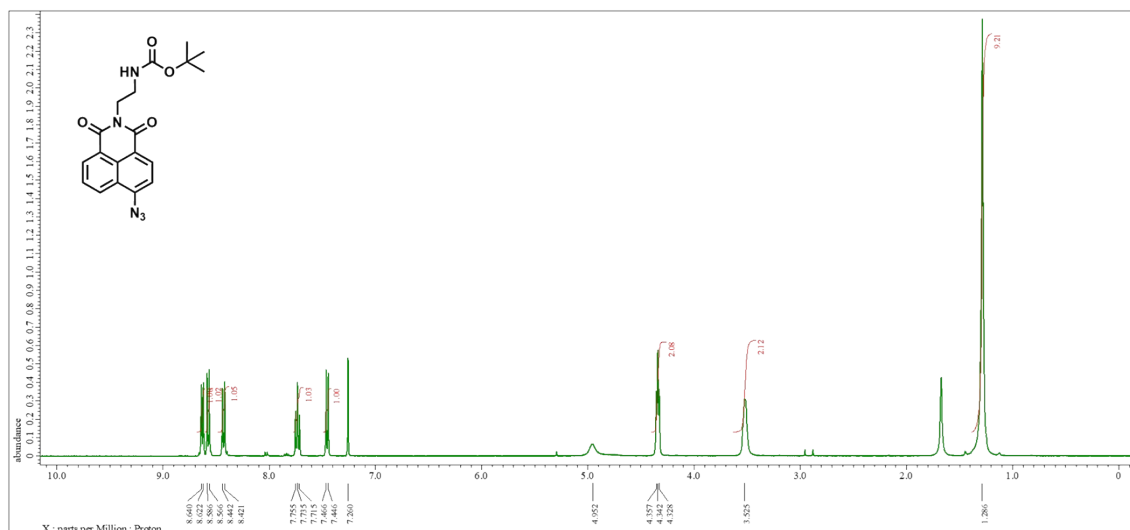

Figure S11. <sup>1</sup>H NMR spectrum (400 MHz, CDCl<sub>3</sub>) of 4.

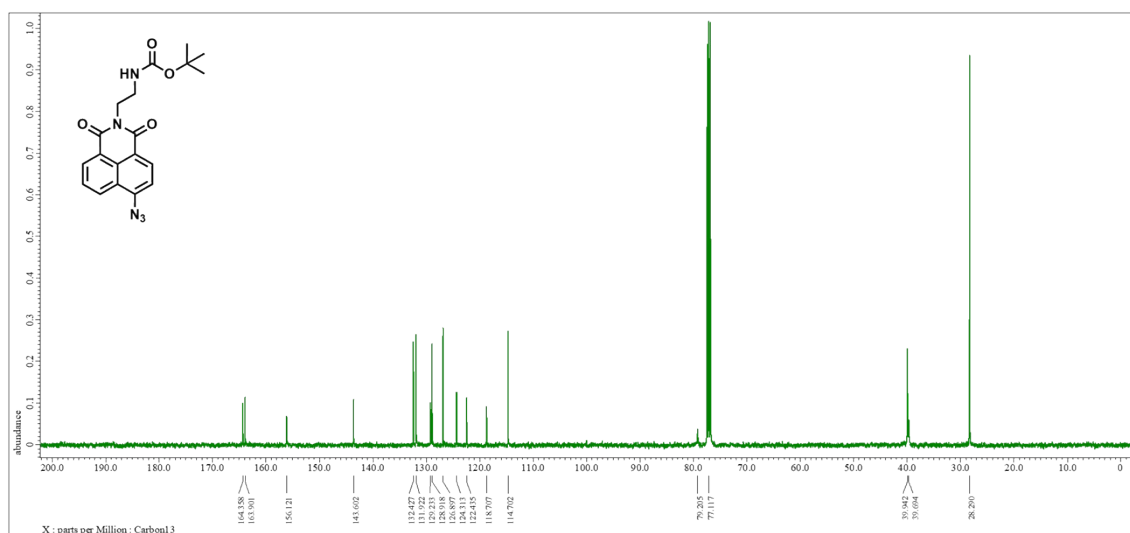

Figure S12. <sup>13</sup>C NMR spectrum (100 MHz, CDCl<sub>3</sub>) of 4.

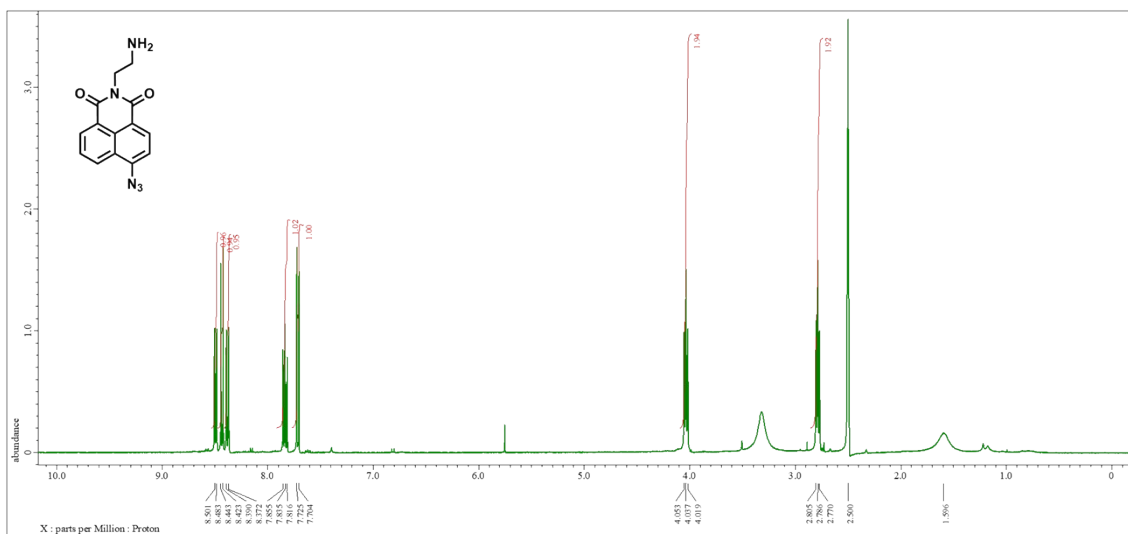

Figure S13.  $^1\text{H}$  NMR spectrum (400 MHz,  $\text{DMSO}-d_6$ ) of 5.

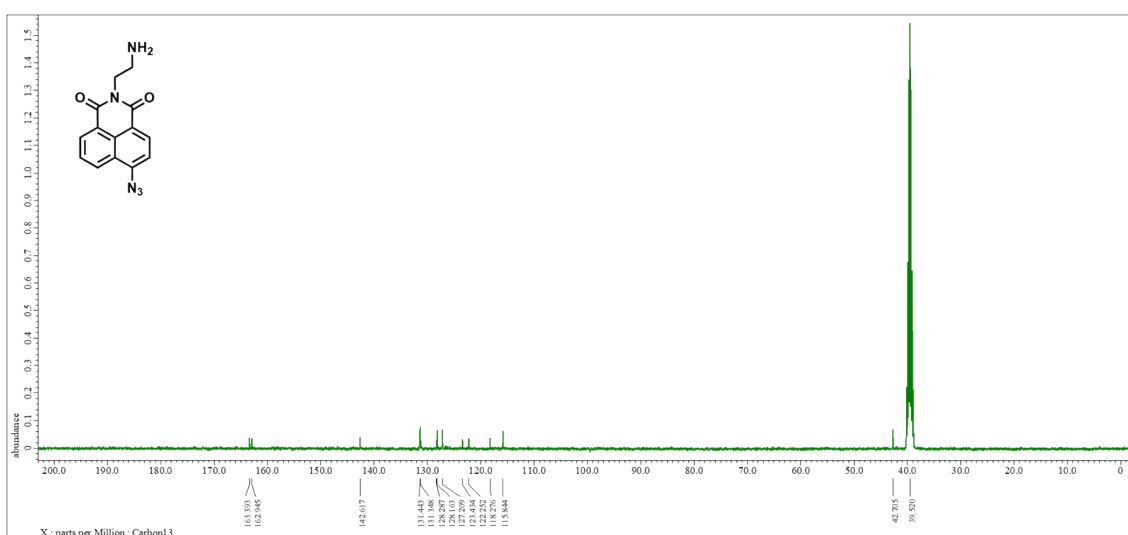

Figure S14.  $^{13}\text{C}$  NMR spectrum (400 MHz,  $\text{DMSO}-d_6$ ) of 5.

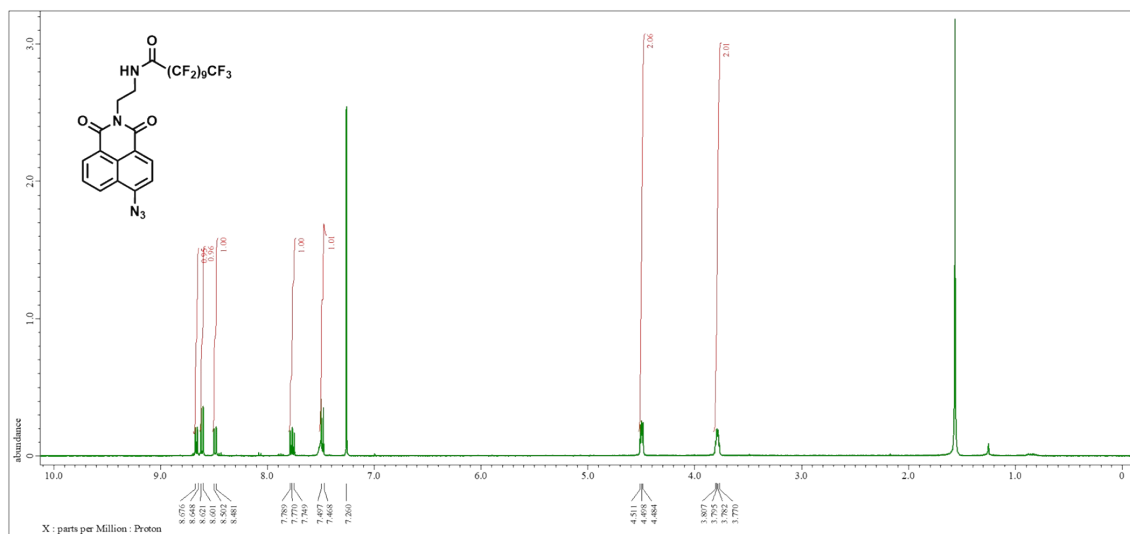

Figure S15.  $^1\text{H}$  NMR spectrum (400 MHz,  $\text{CDCl}_3$ ) of F-Naph- $\text{N}_3$ .

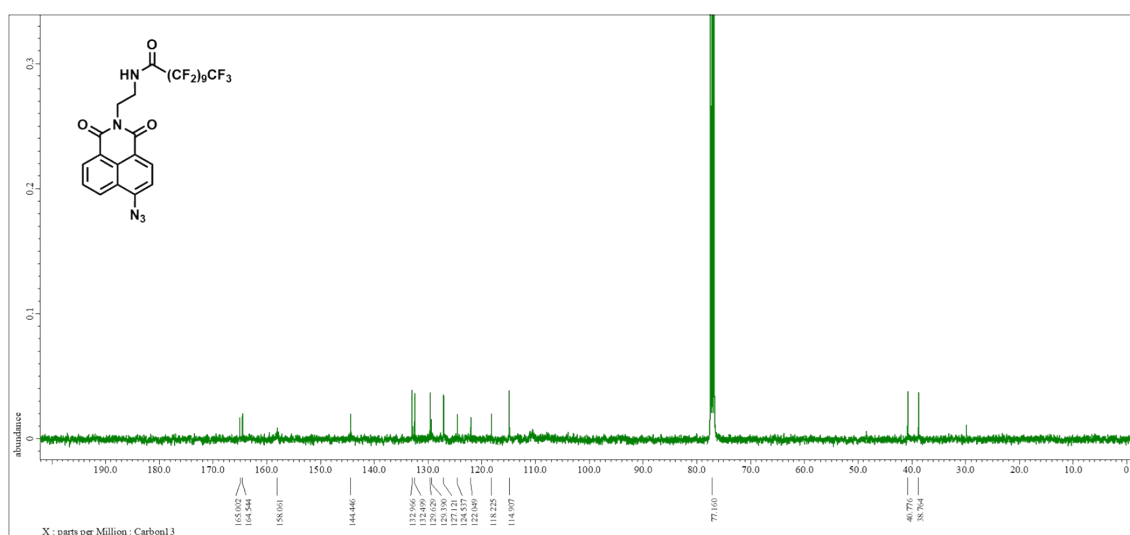

Figure S16.  $^{13}\text{C}$  NMR spectrum (100 MHz,  $\text{CDCl}_3$ ) of F-Naph- $\text{N}_3$ .

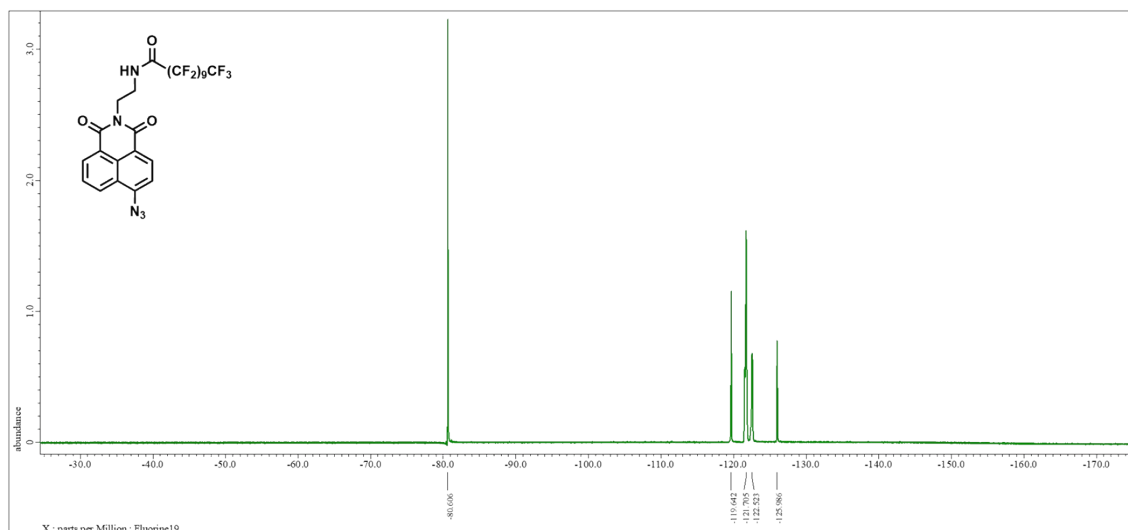

### High-resolution mass spectra

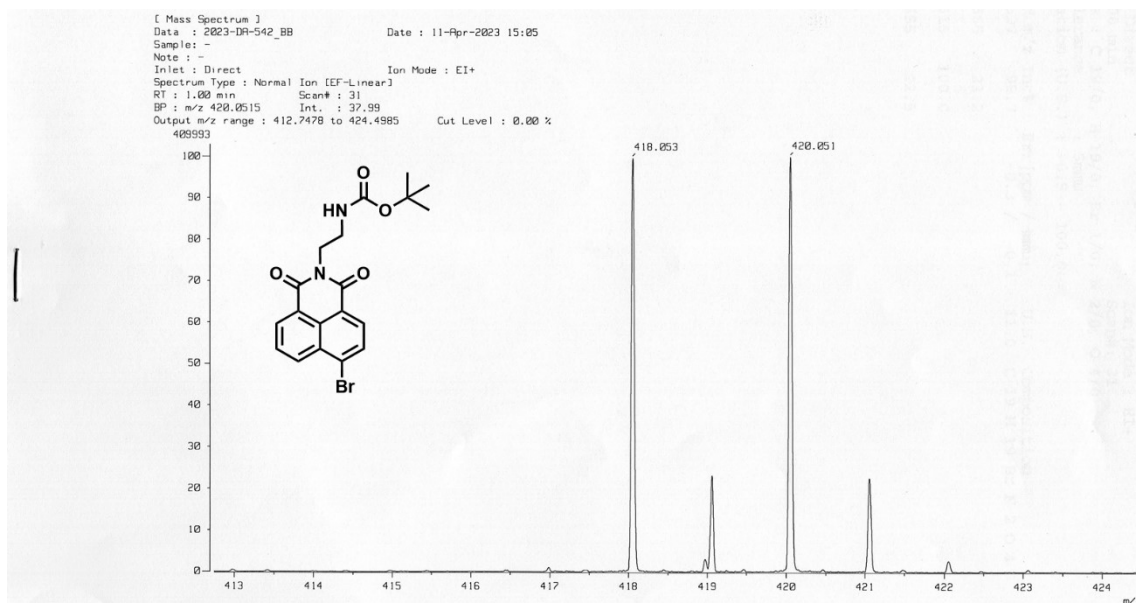

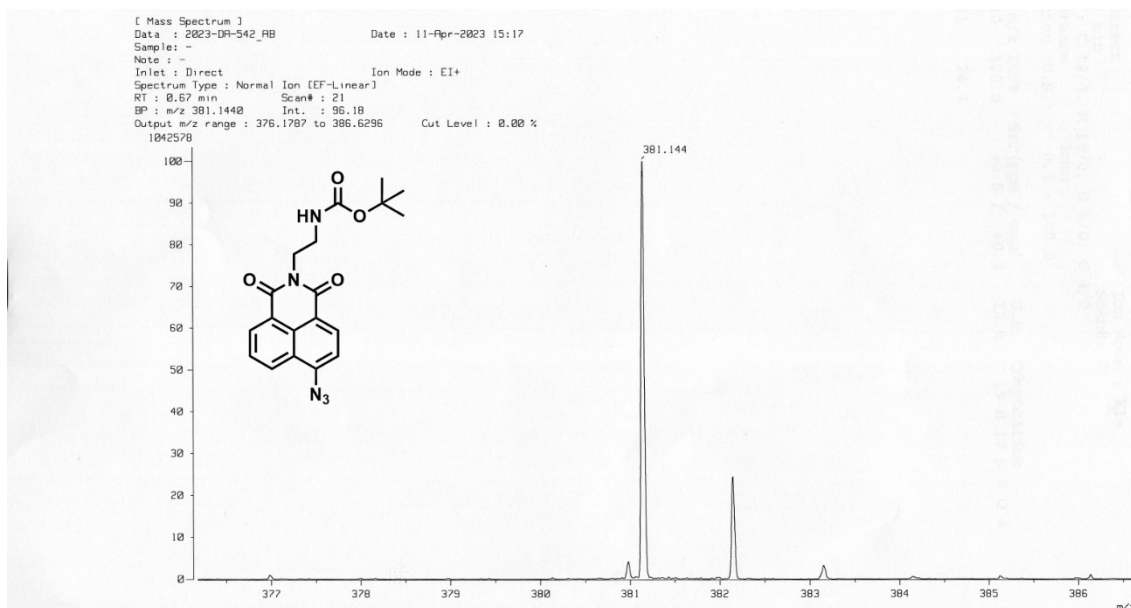

Figure S19. High-resolution mass spectrum (EI+) of 4.

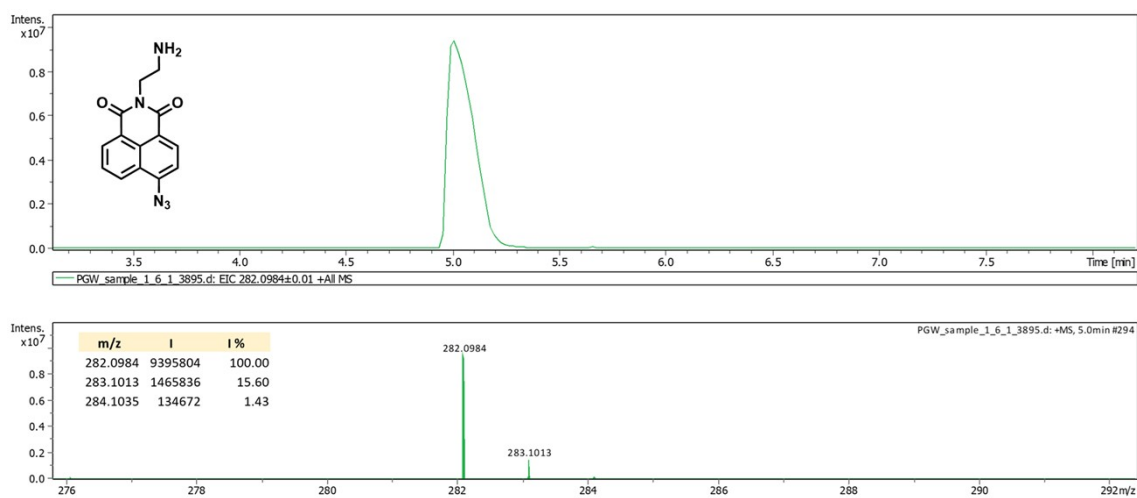

Figure S20. High-resolution mass spectrum (EI+) of 5.

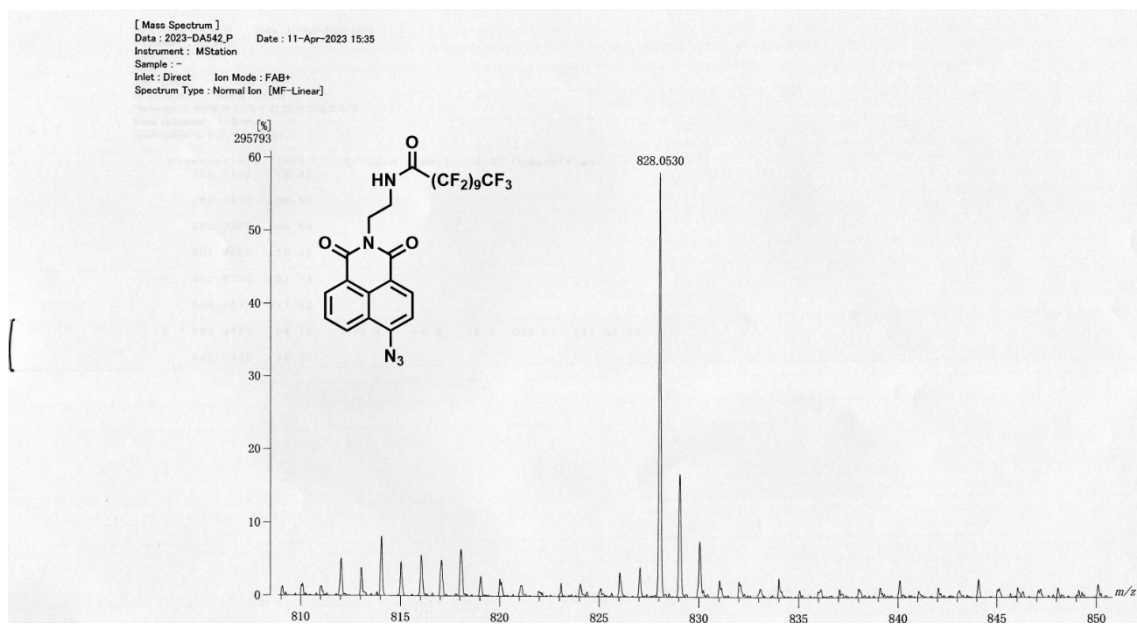

Figure S21. High-resolution mass spectrum (FAB<sup>+</sup>) of F-Naph-N<sub>3</sub>.

### 3. References

[S1] M. D. McKenna, I. Grabchev and P. Bosch, *Dyes Pigment.*, 2009, **81**, 180–186.

[S2] X. Zhou, F. Su, H. Lu, P. Senechal-Willis, Y. Tian, R. H. Johnson and D. R. Meldrum, *Biomaterials*, 2012, **33**, 171–180.
